# Supplementary material
Source: ML conference proceedings conference paper supplement (https://openaccess.thecvf.com/content/cvpr_2016/html/Zhang_How_Far_Are_2016_CVPR_paper.html)
Supplement: Supplementary file 2 [file Zhang_How_Far_Are_2016_CVPR_supplemental.zip]

Archive with 103 entries (96 files):
- 2016_cvpr_camera_ready_pedestrian_detection_supplementary/
- 2016_cvpr_camera_ready_pedestrian_detection_supplementary/2016_cvpr_pedestrian_detection_supplementary_material.pdf
- 2016_cvpr_camera_ready_pedestrian_detection_supplementary/GT-visualization/
- 2016_cvpr_camera_ready_pedestrian_detection_supplementary/GT-visualization/caltech_layout.mat
- 2016_cvpr_camera_ready_pedestrian_detection_supplementary/GT-visualization/gt-new.mat
- 2016_cvpr_camera_ready_pedestrian_detection_supplementary/GT-visualization/gt-standard.mat
- 2016_cvpr_camera_ready_pedestrian_detection_supplementary/GT-visualization/readme.txt
- 2016_cvpr_camera_ready_pedestrian_detection_supplementary/GT-visualization/toolbox/
- 2016_cvpr_camera_ready_pedestrian_detection_supplementary/GT-visualization/toolbox/.gitignore
- 2016_cvpr_camera_ready_pedestrian_detection_supplementary/GT-visualization/toolbox/matlab/
- 2016_cvpr_camera_ready_pedestrian_detection_supplementary/GT-visualization/toolbox/matlab/arrayCrop.m
- 2016_cvpr_camera_ready_pedestrian_detection_supplementary/GT-visualization/toolbox/matlab/arrayToDims.m
- 2016_cvpr_camera_ready_pedestrian_detection_supplementary/GT-visualization/toolbox/matlab/c.m
- 2016_cvpr_camera_ready_pedestrian_detection_supplementary/GT-visualization/toolbox/matlab/cc.m
- 2016_cvpr_camera_ready_pedestrian_detection_supplementary/GT-visualization/toolbox/matlab/ccc.m
- 2016_cvpr_camera_ready_pedestrian_detection_supplementary/GT-visualization/toolbox/matlab/cell2array.m
- 2016_cvpr_camera_ready_pedestrian_detection_supplementary/GT-visualization/toolbox/matlab/char2img.m
- 2016_cvpr_camera_ready_pedestrian_detection_supplementary/GT-visualization/toolbox/matlab/checkNumArgs.m
- 2016_cvpr_camera_ready_pedestrian_detection_supplementary/GT-visualization/toolbox/matlab/Contents.m
- 2016_cvpr_camera_ready_pedestrian_detection_supplementary/GT-visualization/toolbox/matlab/dijkstra.m
- 2016_cvpr_camera_ready_pedestrian_detection_supplementary/GT-visualization/toolbox/matlab/dirSynch.m
- 2016_cvpr_camera_ready_pedestrian_detection_supplementary/GT-visualization/toolbox/matlab/diskFill.m
- 2016_cvpr_camera_ready_pedestrian_detection_supplementary/GT-visualization/toolbox/matlab/dispMatrixIm.m
- 2016_cvpr_camera_ready_pedestrian_detection_supplementary/GT-visualization/toolbox/matlab/fevalArrays.m
- 2016_cvpr_camera_ready_pedestrian_detection_supplementary/GT-visualization/toolbox/matlab/fevalDistr.m
- 2016_cvpr_camera_ready_pedestrian_detection_supplementary/GT-visualization/toolbox/matlab/fevalDistrDisk.m
- 2016_cvpr_camera_ready_pedestrian_detection_supplementary/GT-visualization/toolbox/matlab/fevalImages.m
- 2016_cvpr_camera_ready_pedestrian_detection_supplementary/GT-visualization/toolbox/matlab/fevalMats.m
- 2016_cvpr_camera_ready_pedestrian_detection_supplementary/GT-visualization/toolbox/matlab/figureResized.m
- 2016_cvpr_camera_ready_pedestrian_detection_supplementary/GT-visualization/toolbox/matlab/gauss2ellipse.m
- 2016_cvpr_camera_ready_pedestrian_detection_supplementary/GT-visualization/toolbox/matlab/getPrmDflt.m
- 2016_cvpr_camera_ready_pedestrian_detection_supplementary/GT-visualization/toolbox/matlab/imLabel.m
- 2016_cvpr_camera_ready_pedestrian_detection_supplementary/GT-visualization/toolbox/matlab/ind2sub2.m
- 2016_cvpr_camera_ready_pedestrian_detection_supplementary/GT-visualization/toolbox/matlab/int2str2.m
- 2016_cvpr_camera_ready_pedestrian_detection_supplementary/GT-visualization/toolbox/matlab/isfield2.m
- 2016_cvpr_camera_ready_pedestrian_detection_supplementary/GT-visualization/toolbox/matlab/mat2cell2.m
- 2016_cvpr_camera_ready_pedestrian_detection_supplementary/GT-visualization/toolbox/matlab/medianw.m
- 2016_cvpr_camera_ready_pedestrian_detection_supplementary/GT-visualization/toolbox/matlab/multiDiv.m
- 2016_cvpr_camera_ready_pedestrian_detection_supplementary/GT-visualization/toolbox/matlab/multiTimes.m
- 2016_cvpr_camera_ready_pedestrian_detection_supplementary/GT-visualization/toolbox/matlab/normpdf2.m
- 2016_cvpr_camera_ready_pedestrian_detection_supplementary/GT-visualization/toolbox/matlab/num2strs.m
- 2016_cvpr_camera_ready_pedestrian_detection_supplementary/GT-visualization/toolbox/matlab/plotEllipse.m
- 2016_cvpr_camera_ready_pedestrian_detection_supplementary/GT-visualization/toolbox/matlab/plotGaussEllipses.m
- 2016_cvpr_camera_ready_pedestrian_detection_supplementary/GT-visualization/toolbox/matlab/plotRoc.m
- 2016_cvpr_camera_ready_pedestrian_detection_supplementary/GT-visualization/toolbox/matlab/private/
- 2016_cvpr_camera_ready_pedestrian_detection_supplementary/GT-visualization/toolbox/matlab/private/char2img_h015.mat
- 2016_cvpr_camera_ready_pedestrian_detection_supplementary/GT-visualization/toolbox/matlab/private/char2img_h020.mat
- 2016_cvpr_camera_ready_pedestrian_detection_supplementary/GT-visualization/toolbox/matlab/private/char2img_h025.mat
- 2016_cvpr_camera_ready_pedestrian_detection_supplementary/GT-visualization/toolbox/matlab/private/char2img_h030.mat
- 2016_cvpr_camera_ready_pedestrian_detection_supplementary/GT-visualization/toolbox/matlab/private/char2img_h035.mat
- 2016_cvpr_camera_ready_pedestrian_detection_supplementary/GT-visualization/toolbox/matlab/private/char2img_h050.mat
- 2016_cvpr_camera_ready_pedestrian_detection_supplementary/GT-visualization/toolbox/matlab/private/dijkstra1.cpp
- 2016_cvpr_camera_ready_pedestrian_detection_supplementary/GT-visualization/toolbox/matlab/private/dijkstra1.mexa64
- 2016_cvpr_camera_ready_pedestrian_detection_supplementary/GT-visualization/toolbox/matlab/private/dijkstra1.mexmaci64
- 2016_cvpr_camera_ready_pedestrian_detection_supplementary/GT-visualization/toolbox/matlab/private/dijkstra1.mexw64
- 2016_cvpr_camera_ready_pedestrian_detection_supplementary/GT-visualization/toolbox/matlab/private/fibheap.cpp
- 2016_cvpr_camera_ready_pedestrian_detection_supplementary/GT-visualization/toolbox/matlab/private/fibheap.h
- 2016_cvpr_camera_ready_pedestrian_detection_supplementary/GT-visualization/toolbox/matlab/randint2.m
- 2016_cvpr_camera_ready_pedestrian_detection_supplementary/GT-visualization/toolbox/matlab/randSample.m
- 2016_cvpr_camera_ready_pedestrian_detection_supplementary/GT-visualization/toolbox/matlab/rotationMatrix.m
- 2016_cvpr_camera_ready_pedestrian_detection_supplementary/GT-visualization/toolbox/matlab/simpleCache.m
- 2016_cvpr_camera_ready_pedestrian_detection_supplementary/GT-visualization/toolbox/matlab/spBlkDiag.m
- 2016_cvpr_camera_ready_pedestrian_detection_supplementary/GT-visualization/toolbox/matlab/sub2ind2.m
- 2016_cvpr_camera_ready_pedestrian_detection_supplementary/GT-visualization/toolbox/matlab/subsToArray.m
- 2016_cvpr_camera_ready_pedestrian_detection_supplementary/GT-visualization/toolbox/matlab/text2.m
- 2016_cvpr_camera_ready_pedestrian_detection_supplementary/GT-visualization/toolbox/matlab/ticStatus.m
- 2016_cvpr_camera_ready_pedestrian_detection_supplementary/GT-visualization/toolbox/matlab/tocStatus.m
- 2016_cvpr_camera_ready_pedestrian_detection_supplementary/GT-visualization/toolbox/matlab/tpsGetWarp.m
- 2016_cvpr_camera_ready_pedestrian_detection_supplementary/GT-visualization/toolbox/matlab/tpsInterpolate.m
- 2016_cvpr_camera_ready_pedestrian_detection_supplementary/GT-visualization/toolbox/matlab/tpsInterpolateIm.m
- 2016_cvpr_camera_ready_pedestrian_detection_supplementary/GT-visualization/toolbox/matlab/tpsRandom.m
- 2016_cvpr_camera_ready_pedestrian_detection_supplementary/GT-visualization/toolbox/matlab/txt2img.m
- 2016_cvpr_camera_ready_pedestrian_detection_supplementary/GT-visualization/toolbox/matlab/uniqueColors.m
- 2016_cvpr_camera_ready_pedestrian_detection_supplementary/GT-visualization/toolbox/README.md
- 2016_cvpr_camera_ready_pedestrian_detection_supplementary/GT-visualization/toolbox/videos/
- 2016_cvpr_camera_ready_pedestrian_detection_supplementary/GT-visualization/toolbox/videos/behaviorAnnotator.m
- 2016_cvpr_camera_ready_pedestrian_detection_supplementary/GT-visualization/toolbox/videos/behaviorData.m
- 2016_cvpr_camera_ready_pedestrian_detection_supplementary/GT-visualization/toolbox/videos/Contents.m
- 2016_cvpr_camera_ready_pedestrian_detection_supplementary/GT-visualization/toolbox/videos/imagesAlign.m
- 2016_cvpr_camera_ready_pedestrian_detection_supplementary/GT-visualization/toolbox/videos/imagesAlignSeq.m
- 2016_cvpr_camera_ready_pedestrian_detection_supplementary/GT-visualization/toolbox/videos/kernelTracker.m
- 2016_cvpr_camera_ready_pedestrian_detection_supplementary/GT-visualization/toolbox/videos/opticalFlow.m
- 2016_cvpr_camera_ready_pedestrian_detection_supplementary/GT-visualization/toolbox/videos/peds30-seek.mat
- 2016_cvpr_camera_ready_pedestrian_detection_supplementary/GT-visualization/toolbox/videos/private/
- 2016_cvpr_camera_ready_pedestrian_detection_supplementary/GT-visualization/toolbox/videos/private/ktComputeW_c.c
- 2016_cvpr_camera_ready_pedestrian_detection_supplementary/GT-visualization/toolbox/videos/private/ktComputeW_c.mexa64
- 2016_cvpr_camera_ready_pedestrian_detection_supplementary/GT-visualization/toolbox/videos/private/ktComputeW_c.mexmaci64
- 2016_cvpr_camera_ready_pedestrian_detection_supplementary/GT-visualization/toolbox/videos/private/ktComputeW_c.mexw64
- 2016_cvpr_camera_ready_pedestrian_detection_supplementary/GT-visualization/toolbox/videos/private/ktHistcRgb_c.c
- 2016_cvpr_camera_ready_pedestrian_detection_supplementary/GT-visualization/toolbox/videos/private/ktHistcRgb_c.mexa64
- 2016_cvpr_camera_ready_pedestrian_detection_supplementary/GT-visualization/toolbox/videos/private/ktHistcRgb_c.mexmaci64
- 2016_cvpr_camera_ready_pedestrian_detection_supplementary/GT-visualization/toolbox/videos/private/ktHistcRgb_c.mexw64
- 2016_cvpr_camera_ready_pedestrian_detection_supplementary/GT-visualization/toolbox/videos/private/opticalFlowHsMex.cpp
- 2016_cvpr_camera_ready_pedestrian_detection_supplementary/GT-visualization/toolbox/videos/private/opticalFlowHsMex.mexa64
- 2016_cvpr_camera_ready_pedestrian_detection_supplementary/GT-visualization/toolbox/videos/private/opticalFlowHsMex.mexmaci64
- 2016_cvpr_camera_ready_pedestrian_detection_supplementary/GT-visualization/toolbox/videos/private/opticalFlowHsMex.mexw64
- 2016_cvpr_camera_ready_pedestrian_detection_supplementary/GT-visualization/toolbox/videos/private/rjpg8c.mexa64
- 2016_cvpr_camera_ready_pedestrian_detection_supplementary/GT-visualization/toolbox/videos/private/rjpg8c.mexw64
- 2016_cvpr_camera_ready_pedestrian_detection_supplementary/GT-visualization/toolbox/videos/seqIo.m
- 2016_cvpr_camera_ready_pedestrian_detection_supplementary/GT-visualization/toolbox/videos/seqPlayer.m
- 2016_cvpr_camera_ready_pedestrian_detection_supplementary/GT-visualization/toolbox/videos/seqReaderPlugin.m
- 2016_cvpr_camera_ready_pedestrian_detection_supplementary/GT-visualization/toolbox/videos/seqWriterPlugin.m
- 2016_cvpr_camera_ready_pedestrian_detection_supplementary/GT-visualization/visualize_annotations.m
