# Supplementary material
Source: ML conference proceedings conference paper supplement (https://openaccess.thecvf.com/content/cvpr_2016/html/Zhang_How_Far_Are_2016_CVPR_paper.html)
Supplement: Supplementary file 2 [file Zhang_How_Far_Are_2016_CVPR_supplemental.zip › 2016_cvpr_camera_ready_pedestrian_detection_supplementary/GT-visualization/toolbox/matlab/c.m]

% clc - clear command window.
%
% USAGE
%  c
%
% INPUTS
%
% OUTPUTS
%
% EXAMPLE
%
% See also CLC, CC, CCC
%
% Piotr's Computer Vision Matlab Toolbox      Version 1.5
% Copyright 2014 Piotr Dollar.  [pdollar-at-gmail.com]
% Licensed under the Simplified BSD License [see external/bsd.txt]

clc
