# Supplementary material
Source: ML conference proceedings conference paper supplement (https://openaccess.thecvf.com/content/cvpr_2016/html/Zhang_How_Far_Are_2016_CVPR_paper.html)
Supplement: Supplementary file 2 [file Zhang_How_Far_Are_2016_CVPR_supplemental.zip › 2016_cvpr_camera_ready_pedestrian_detection_supplementary/GT-visualization/toolbox/matlab/ccc.m]

% clear, close all, clc, clear global
%
% USAGE
%  ccc
%
% INPUTS
%
% OUTPUTS
%
% EXAMPLE
%
% See also C, CC
%
% Piotr's Computer Vision Matlab Toolbox      Version 1.5
% Copyright 2014 Piotr Dollar.  [pdollar-at-gmail.com]
% Licensed under the Simplified BSD License [see external/bsd.txt]

clear; close all; clc; clear all;
