# Supplementary material
Source: ML conference proceedings conference paper supplement (https://openaccess.thecvf.com/content/cvpr_2016/html/Zhang_How_Far_Are_2016_CVPR_paper.html)
Supplement: Supplementary file 2 [file Zhang_How_Far_Are_2016_CVPR_supplemental.zip › 2016_cvpr_camera_ready_pedestrian_detection_supplementary/GT-visualization/toolbox/matlab/cell2array.m]

function Y = cell2array( X, padEl )
% Flattens a cell array of regular arrays into a regular array.
%
% Each element of X must be a regular array, and must have the same number
% of dimensions k.  Converts X to an array Y of dimension k+1 where
% Y(:,:...,:,i) is X{i} padded to be as big as the biggest element in X
% (along each dimension). Specifically, let di1..dik be the k dimensions of
% element X{i}.  Let dj=max(dij) for each j.  Then each element of X{i} is
% padded to have size [d1 ... dk], and then the elements of X are stacked
% into a vector.  Treats the cell array X as a vector (so ignores the
% layout of X).
%
% USAGE
%  Y = cell2array( X, [padEl] )
%
% INPUTS
%  X          - cell array of regular arrays each with dimension k
%  padEl      - [0] element with which to pad
%
% OUTPUTS
%  Y         - resulting array of dimension k+1
%
% EXAMPLE
%  for i=1:10; X{i}=rand(30); end; Y = cell2array(X);
%
% See also MAT2CELL2, CELL2MAT
%
% Piotr's Computer Vision Matlab Toolbox      Version 2.40
% Copyright 2014 Piotr Dollar.  [pdollar-at-gmail.com]
% Licensed under the Simplified BSD License [see external/bsd.txt]

if(~iscell(X)); error('X must be a cell array'); end
if(iscell(X{1})); error('X must contain regular arrays'); end
n = numel(X); nd = ndims(X{1});
for i=2:n
  if(ndims(X{i})~=nd); error('all elem of X must have same dims'); end
end
if(nargin<2); padEl=0; end

%%% get maximum and minimum size of any element of X
maxsiz = size(X{1}); minsiz = size(X{1});
for i=1:n
  siz = size(X{i});
  maxsiz = max( maxsiz, siz );
  minsiz = min( minsiz, siz );
end

%%% construct Y
inds=cell(1,nd);  for d=1:nd; inds{d} = 1:maxsiz(d); end
Y = zeros( [maxsiz n], class(X{1}) );
if( all(maxsiz==minsiz) )
  for i=1:n; Y( inds{:}, i ) = X{i}; end
else
  for i=1:n; Y( inds{:}, i ) = arrayToDims( X{i}, maxsiz, padEl); end
end
