# Supplementary material
Source: ML conference proceedings conference paper supplement (https://openaccess.thecvf.com/content/cvpr_2016/html/Zhang_How_Far_Are_2016_CVPR_paper.html)
Supplement: Supplementary file 2 [file Zhang_How_Far_Are_2016_CVPR_supplemental.zip › 2016_cvpr_camera_ready_pedestrian_detection_supplementary/GT-visualization/toolbox/matlab/fevalDistrDisk.m]

function fevalDistrDisk( funNm, jobDir, jobId )
% Helper for fevalDistr (do no call directly).
%
% USAGE
%  fevalDistrDisk( funNm, jobDir, jobId )
%
% INPUTS
%
% OUTPUTS
%
% EXAMPLE
%
% See also fevalDistr
%
% Piotr's Computer Vision Matlab Toolbox      Version 3.02
% Copyright 2014 Piotr Dollar.  [pdollar-at-gmail.com]
% Licensed under the Simplified BSD License [see external/bsd.txt]
jobId=[jobDir int2str2(str2double(jobId),10)];
fIn=[jobId '-in.mat']; if(exist(fIn,'file')~=2), return; end
job=load(fIn); job=job.job;
r=feval(funNm,job{:}); save([jobId '-out'],'r'); %#ok<NASGU>
f=fopen([jobId '-done'],'w'); fclose(f);
end
