# Supplementary material
Source: ML conference proceedings conference paper supplement (https://openaccess.thecvf.com/content/cvpr_2016/html/Zhang_How_Far_Are_2016_CVPR_paper.html)
Supplement: Supplementary file 2 [file Zhang_How_Far_Are_2016_CVPR_supplemental.zip › 2016_cvpr_camera_ready_pedestrian_detection_supplementary/GT-visualization/toolbox/matlab/plotEllipse.m]

function [h,hc,hl] = plotEllipse(cRow,cCol,ra,rb,phi,color,nPnts,lw,ls)
% Adds an ellipse to the current plot.
%
% USAGE
%  [h,hc,hl] = plotEllipse(cRow,cCol,ra,rb,phi,[color],[nPnts],[lw],[ls])
%
% INPUTS
%  cRow    - the row location of the center of the ellipse
%  cCol    - the column location of the center of the ellipse
%  ra      - semi-major axis radius length (in pixels) of the ellipse
%  rb      - semi-minor axis radius length (in pixels) of the ellipse
%  phi     - rotation angle (radians) of semimajor axis from x-axis
%  color   - ['b'] color for ellipse
%  nPnts   - [100] number of points used to draw each ellipse
%  lw      - [1] line width
%  ls      - ['-'] line style
%
% OUTPUT
%  h       - handle to ellipse
%  hc      - handle to ellipse center
%  hl      - handle to ellipse orient
%
% EXAMPLE
%  plotEllipse( 3, 2, 1, 5, pi/6, 'g');
%
% See also plotGaussEllipses
%
% Piotr's Computer Vision Matlab Toolbox      Version 2.42
% Copyright 2014 Piotr Dollar.  [pdollar-at-gmail.com]
% Licensed under the Simplified BSD License [see external/bsd.txt]

narginchk( 5, 9 );
if(nargin<6 || isempty(color)); color = 'b'; end
if(nargin<7 || isempty(nPnts)); nPnts = 100; end
if(nargin<8 || isempty(nPnts)); lw = 1; end
if(nargin<9 || isempty(ls)); ls = '-'; end

% plot ellipse (rotate a scaled circle):
ts = linspace(-pi,pi,nPnts+1);  cts = cos(ts); sts = sin(ts);
h = plot( ra*cts*cos(-phi) + rb*sts*sin(-phi) + cCol, ...
  rb*sts*cos(-phi) - ra*cts*sin(-phi) + cRow );

% plot center point and line indicating orientation
washeld = ishold; if(~washeld); hold('on'); end
hc = plot( cCol, cRow, 'k+' );
hl = plot( [cCol cCol+cos(-phi)*ra], [cRow cRow-sin(-phi)*ra] );
set([h hc hl],'Color',color,'LineWidth',lw,'LineStyle',ls);
if(~washeld); hold('off'); end;

end
