# Supplementary material
Source: ML conference proceedings conference paper supplement (https://openaccess.thecvf.com/content/cvpr_2016/html/Zhang_How_Far_Are_2016_CVPR_paper.html)
Supplement: Supplementary file 2 [file Zhang_How_Far_Are_2016_CVPR_supplemental.zip › 2016_cvpr_camera_ready_pedestrian_detection_supplementary/GT-visualization/toolbox/matlab/private/fibheap.cpp]

#define _FIBHEAP_CPP

//***************************************************************************
// This Fibonacci heap implementation is Copyright (c) 1996 by John Boyer.
// See the header file for free usage information.
//***************************************************************************

//***************************************************************************
// The classes in this package are designed to allow the package user
// to quickly and easily develop applications that require a heap data
// structure.  Using amortized analysis, the asymptotically fastest heap
// data structure is the Fibonacci heap.  The constants are a little
// high so the real speed gain will not be seen until larger data sets
// are required, but in most cases, if the data set is small, then the
// run-time will be neglible anyway.
//
// To use this heap class you need do only two things.  First, subclass
// the FibHeapNode class to create the class of objects that you'd
// like to store in a heap.  Second, create an instance of the FibHeap
// class, which can then be used to Insert(), ExtractMin(), etc.,
// instances of your FibHeapNode subclass.  Notice that you don't need
// to create a subclass of the FibHeap class.
//
// The application-specific data object that you'd like to store in a heap
// will have a key value.  In the class that you derive from FibHeapNode,
// you will need to define the key structure then provide assignment (=),
// equality (==) and less-than operators and a destructor.  These functions
// are declared virtual so that the code in the FibHeap class can compare,
// assign and destroy your objects by calling on your code.
//
// The overloaded operators in your defined class MUST call functions in
// the Fibonacci heap node class first.  For assignment, the function
// FHN_Assign() should be called before code that deals with the copy of
// the key value.  For comparison operators, the function FHN_Cmp() should
// appear first.  If it returns 0, then keys can be compared as normal.
// The following indicates what the three most common operators must do
// based on the return value of FHN_Cmp()
//
// For ==, if zero returned, then compare keys
//     if non-zero X returned, then return 0
// For <,  if zero returned, then compare keys
//         if non-zero X returned, then return X<0?1:0
// For >,  if zero returned, then compare keys
//         if non-zero X returned, then return X>0?1:0
//***************************************************************************


#include <cstdlib>
#include <iostream>
#include <cstdio>
#include "fibheap.h"
using namespace std;

//***************************************************************************
//=========================================================
// FibHeapNode Constructor
//=========================================================
//***************************************************************************

//FibHeapNode::FibHeapNode() {
//  Left = Right = Parent = Child = NULL;
//  Degree = Mark = NegInfinityFlag = 0;
//}

//=========================================================
// FibHeapNode Destructor
//
// Body is empty, but declaration is required in order to
// force virtual.  This will ensure that FibHeap class
// calls derived class destructors.
//=========================================================

FibHeapNode::~FibHeapNode() {}

//=========================================================
// FHN_Assign()
//
// To be used as first step of an assignment operator in a
// derived class.  The derived class will handle assignment
// of key value, and this function handles copy of the
// NegInfinityFlag (which overrides the key value if it is
// set).
//=========================================================

//void FibHeapNode::FHN_Assign(FibHeapNode& RHS) {
//  NegInfinityFlag = RHS.NegInfinityFlag;
//}

//=========================================================
// FHN_Cmp()
//
// To be used as the first step of ALL comparators in a
// derived class.
//
// Compares the relative state of the two neg. infinity
// flags.  Note that 'this' is the left hand side.  If
// LHS neg. infinity is set, then it will be less than (-1)
// the RHS unless RHS neg. infinity flag is also set.
// Only if function returns 0 should the key comparison
// defined in the derived class be performed, e.g.
//
// For ==, if zero returned, then compare keys
//     if non-zero X returned, then return 0
// For <,  if zero returned, then compare keys
//         if non-zero X returned, then return X<0?1:0
// For >,  if zero returned, then compare keys
//         if non-zero X returned, then return X>0?1:0
//=========================================================

//int  FibHeapNode::FHN_Cmp(FibHeapNode& RHS) {
//  if (NegInfinityFlag)
//    return RHS.NegInfinityFlag ? 0 : -1;
//  return RHS.NegInfinityFlag ? 1 : 0;
//}

//========================================================================
// We do, on occasion, compare and assign objects of type FibHeapNode, but
// only when the NegInfinityFlag is set.  See for example FibHeap::Delete().
//
// Also, these functions exemplify what a derived class should do.
//========================================================================

void FibHeapNode::operator =(FibHeapNode& RHS) {
	FHN_Assign(RHS);
	// Key assignment goes here in derived classes
}

int  FibHeapNode::operator ==(FibHeapNode& RHS) {
	if (FHN_Cmp(RHS)) return 0;
	// Key compare goes here in derived classes
	return 1;
}

int  FibHeapNode::operator <(FibHeapNode& RHS) {
	int X;
	if ((X=FHN_Cmp(RHS)) != 0)
		return X < 0 ? 1 : 0;
	// Key compare goes here in derived classes
	return 0;
}

//=========================================================
// Print()
//=========================================================

void FibHeapNode::Print() {
	if (NegInfinityFlag)
		cout << "-inf.";
}

//***************************************************************************
//===========================================================================
// FibHeap Constructor
//===========================================================================
//***************************************************************************

FibHeap::FibHeap() {
	MinRoot = NULL;
	NumNodes = NumTrees = NumMarkedNodes = 0;
	ClearHeapOwnership();
}

//===========================================================================
// FibHeap Destructor
//===========================================================================

FibHeap::~FibHeap() {
	FibHeapNode *Temp;

	if (GetHeapOwnership()) {
		while (MinRoot != NULL) {
			Temp = ExtractMin();
			delete Temp;
		}
	}
}

//===========================================================================
// Insert() - O(1) actual; O(2) amortized
//
// I am using O(2) here to indicate that although Insert() is
// constant time, its amortized rating is more costly because some
// of the work of inserting is done by other operations such as
// ExtractMin(), which is where tree-balancing occurs.
//
// The child pointer is deliberately not set to NULL because Insert()
// is also used internally to help put whole trees onto the root list.
//===========================================================================

void FibHeap::Insert(FibHeapNode *NewNode) {
	if (NewNode == NULL) return;

	// If the heap is currently empty, then new node becomes singleton
	// circular root list

	if (MinRoot == NULL)
		MinRoot = NewNode->Left = NewNode->Right = NewNode;

	else {
		// Pointers from NewNode set to insert between MinRoot and MinRoot->Right

		NewNode->Right = MinRoot->Right;
		NewNode->Left = MinRoot;

		// Set Pointers to NewNode

		NewNode->Left->Right = NewNode;
		NewNode->Right->Left = NewNode;

		// The new node becomes new MinRoot if it is less than current MinRoot

		if (*NewNode < *MinRoot)
			MinRoot = NewNode;
	}

	// We have one more node in the heap, and it is a tree on the root list

	NumNodes++;

	NumTrees++;
	NewNode->Parent = NULL;
}

//===========================================================================
// Union() - O(1) actual; O(1) amortized
//===========================================================================

void FibHeap::Union(FibHeap *OtherHeap) {
	FibHeapNode *Min1, *Min2, *Next1, *Next2;

	if (OtherHeap == NULL || OtherHeap->MinRoot == NULL) return;

	// We join the two circular lists by cutting each list between its
	// min node and the node after the min.  This code just pulls those
	// nodes into temporary variables so we don't get lost as changes
	// are made.

	Min1 = MinRoot;
	Min2 = OtherHeap->MinRoot;
	Next1 = Min1->Right;
	Next2 = Min2->Right;

	// To join the two circles, we join the minimum nodes to the next
	// nodes on the opposite chains.  Conceptually, it looks like the way
	// two bubbles join to form one larger bubble.  They meet at one point
	// of contact, then expand out to make the bigger circle.

	Min1->Right = Next2;
	Next2->Left = Min1;
	Min2->Right = Next1;
	Next1->Left = Min2;

	// Choose the new minimum for the heap

	if (*Min2 < *Min1)
		MinRoot = Min2;

	// Set the amortized analysis statistics and size of the new heap

	NumNodes += OtherHeap->NumNodes;
	NumMarkedNodes += OtherHeap->NumMarkedNodes;
	NumTrees += OtherHeap->NumTrees;

	// Complete the union by setting the other heap to emptiness
	// then destroying it

	OtherHeap->MinRoot  = NULL;
	OtherHeap->NumNodes =
		OtherHeap->NumTrees =
		OtherHeap->NumMarkedNodes = 0;

	delete OtherHeap;
}

//===========================================================================
// Minimum - O(1) actual; O(1) amortized
//===========================================================================

//FibHeapNode *FibHeap::Minimum() {
//  return MinRoot;
//}

//===========================================================================
// ExtractMin() - O(n) worst-case actual; O(lg n) amortized
//===========================================================================

FibHeapNode *FibHeap::ExtractMin() {
	FibHeapNode *Result;
	FibHeap *ChildHeap = NULL;

	// Remove minimum node and set MinRoot to next node

	if ((Result = Minimum()) == NULL)
		return NULL;

	MinRoot = Result->Right;
	Result->Right->Left = Result->Left;
	Result->Left->Right = Result->Right;
	Result->Left = Result->Right = NULL;

	NumNodes --;
	if (Result->Mark) {
		NumMarkedNodes --;
		Result->Mark = 0;
	}
	Result->Degree = 0;

	// Attach child list of Minimum node to the root list of the heap
	// If there is no child list, then do no work

	if (Result->Child == NULL) {
		if (MinRoot == Result)
			MinRoot = NULL;
	}

	// If MinRoot==Result then there was only one root tree, so the
	// root list is simply the child list of that node (which is
	// NULL if this is the last node in the list)

	else if (MinRoot == Result)
		MinRoot = Result->Child;

	// If MinRoot is different, then the child list is pushed into a
	// new temporary heap, which is then merged by Union() onto the
	// root list of this heap.

	else {
		ChildHeap = new FibHeap();
		ChildHeap->MinRoot = Result->Child;
	}

	// Complete the disassociation of the Result node from the heap

	if (Result->Child != NULL)
		Result->Child->Parent = NULL;
	Result->Child = Result->Parent = NULL;

	// If there was a child list, then we now merge it with the
	//  rest of the root list

	if (ChildHeap)
		Union(ChildHeap);

	// Consolidate heap to find new minimum and do reorganize work

	if (MinRoot != NULL)
		_Consolidate();

	// Return the minimum node, which is now disassociated with the heap
	// It has Left, Right, Parent, Child, Mark and Degree cleared.

	return Result;
}

//===========================================================================
// DecreaseKey() - O(lg n) actual; O(1) amortized
//
// The O(lg n) actual cost stems from the fact that the depth, and
// therefore the number of ancestor parents, is bounded by O(lg n).
//===========================================================================

int  FibHeap::DecreaseKey(FibHeapNode *theNode, FibHeapNode& NewKey) {
	FibHeapNode *theParent;

	if (theNode==NULL || *theNode < NewKey)
		return NOTOK;

	*theNode = NewKey;

	theParent = theNode->Parent;
	if (theParent != NULL && *theNode < *theParent) {
		_Cut(theNode, theParent);
		_CascadingCut(theParent);
	}

	if (*theNode < *MinRoot)
		MinRoot = theNode;

	return OK;
}

//===========================================================================
// Delete() - O(lg n) amortized; ExtractMin() dominates
//
// Notice that if we don't own the heap nodes, then we clear the
// NegInfinityFlag on the deleted node.  Presumably, the programmer
// will be reusing the node.
//===========================================================================

int  FibHeap::Delete(FibHeapNode *theNode) {
	FibHeapNode Temp;
	int Result;

	if (theNode == NULL) return NOTOK;

	Temp.NegInfinityFlag = 1;
	Result = DecreaseKey(theNode, Temp);

	if (Result == OK)
		if (ExtractMin() == NULL)
			Result = NOTOK;

	if (Result == OK) {
		if (GetHeapOwnership())
			delete theNode;
		else
			theNode->NegInfinityFlag = 0;
	}

	return Result;
}

//========================================================================
// Print()
//
// Used internally for debugging purposes.  The function prints the key
// value for each node along the root list, then it calls itself on each
// child list.
//========================================================================

void FibHeap::Print(FibHeapNode *Tree, FibHeapNode *theParent) {
	FibHeapNode* Temp = NULL;

	if (Tree == NULL) Tree = MinRoot;

	Temp = Tree;
	do {
		if (Temp->Left == NULL)
			cout << "(Left is NULL)";
		Temp->Print();
		if (Temp->Parent != theParent)
			cout << "(Parent is incorrect)";
		if (Temp->Right == NULL)
			cout << "(Right is NULL)";
		else if (Temp->Right->Left != Temp)
			cout << "(Error in left link left) ->";
		else cout << " <-> ";

		Temp = Temp->Right;
		/*
		if (kbhit() && getch() == 27)
		{
		cout << "Hit a key to resume or ESC to break\n";
		if (getch() == 27)
		break;
		}
		*/
	} while (Temp != NULL && Temp != Tree);
	cout << '\n';

	Temp = Tree;
	do {
		cout << "Children of ";
		Temp->Print();
		cout << ": ";
		if (Temp->Child == NULL)
			cout << "NONE\n";
		else Print(Temp->Child, Temp);
		Temp = Temp->Right;
	} while (Temp!=NULL && Temp != Tree);

	if (theParent == NULL) {
		char ch;

		cout << "Done Printing.  Hit a key.\n";
		cin >> ch;
	}
}

//===========================================================================
//===========================================================================

//void FibHeap::_Exchange(FibHeapNode*& N1, FibHeapNode*& N2) {
//  FibHeapNode *Temp;
//  Temp = N1;
//  N1 = N2;
//  N2 = Temp;
//}

//===========================================================================
// Consolidate()
//
// Internal function that reorganizes heap as part of an ExtractMin().
// We must find new minimum in heap, which could be anywhere along the
// root list.  The search could be O(n) since all nodes could be on
// the root list.  So, we reorganize the tree into more of a binomial forest
// structure, and then find the new minimum on the consolidated O(lg n) sized
// root list, and in the process set each Parent pointer to NULL, and count
// the number of resulting subtrees.
//
// Note that after a list of n inserts, there will be n nodes on the root
// list, so the first ExtractMin() will be O(n) regardless of whether or
// not we consolidate.  However, the consolidation causes subsequent
// ExtractMin() operations to be O(lg n).  Furthermore, the extra cost of
// the first ExtractMin() is covered by the higher amortized cost of
// Insert(), which is the real governing factor in how costly the first
// ExtractMin() will be.
//===========================================================================

void FibHeap::_Consolidate() {
	FibHeapNode *x, *y, *w;
	FibHeapNode *A[1+8*sizeof(long)]; // 1+lg(n)
	int  I=0, Dn = 1+8*sizeof(long);
	short d;

	// Initialize the consolidation detection array

	for (I=0; I < Dn; I++)
		A[I] = NULL;

	// We need to loop through all elements on root list.
	// When a collision of degree is found, the two trees
	// are consolidated in favor of the one with the lesser
	// element key value.  We first need to break the circle
	// so that we can have a stopping condition (we can't go
	// around until we reach the tree we started with
	// because all root trees are subject to becoming a
	// child during the consolidation).

	MinRoot->Left->Right = NULL;
	MinRoot->Left = NULL;
	w = MinRoot;

	do {
		//cout << "Top of Consolidate's loop\n";
		//Print(w);

		x = w;
		d = x->Degree;
		w = w->Right;

		// We need another loop here because the consolidated result
		// may collide with another large tree on the root list.

		while (A[d] != NULL) {
			y = A[d];
			if (*y < *x)
				_Exchange(x, y);
			if (w == y) w = y->Right;
			_Link(y, x);
			A[d] = NULL;
			d++;
			//cout << "After a round of Linking\n";
			//Print(x);
		}
		A[d] = x;

	} while (w != NULL);

	// Now we rebuild the root list, find the new minimum,
	// set all root list nodes' parent pointers to NULL and
	// count the number of subtrees.

	MinRoot = NULL;
	NumTrees = 0;
	for (I = 0; I < Dn; I++)
		if (A[I] != NULL)
			_AddToRootList(A[I]);
}

//===========================================================================
// The node y is removed from the root list and becomes a subtree of node x.
//===========================================================================

void FibHeap::_Link(FibHeapNode *y, FibHeapNode *x) {
	// Remove node y from root list

	if (y->Right != NULL)
		y->Right->Left = y->Left;
	if (y->Left != NULL)
		y->Left->Right = y->Right;
	NumTrees--;

	// Make node y a singleton circular list with a parent of x

	y->Left = y->Right = y;
	y->Parent = x;

	// If node x has no children, then list y is its new child list

	if (x->Child == NULL)
		x->Child = y;

	// Otherwise, node y must be added to node x's child list

	else {
		y->Left = x->Child;
		y->Right = x->Child->Right;
		x->Child->Right = y;
		y->Right->Left = y;
	}

	// Increase the degree of node x because it's now a bigger tree

	x->Degree ++;

	// Node y has just been made a child, so clear its mark

	if (y->Mark) NumMarkedNodes--;
	y->Mark = 0;
}

//===========================================================================
//===========================================================================

void FibHeap::_AddToRootList(FibHeapNode *x) {
	if (x->Mark) NumMarkedNodes --;
	x->Mark = 0;

	NumNodes--;
	Insert(x);
}

//===========================================================================
// Remove node x from the child list of its parent node y
//===========================================================================

void FibHeap::_Cut(FibHeapNode *x, FibHeapNode *y) {
	if (y->Child == x)
		y->Child = x->Right;
	if (y->Child == x)
		y->Child = NULL;

	y->Degree --;

	x->Left->Right = x->Right;
	x->Right->Left = x->Left;

	_AddToRootList(x);
}

//===========================================================================
// Cuts each node in parent list, putting successive ancestor nodes on the
// root list until we either arrive at the root list or until we find an
// ancestor that is unmarked.  When a mark is set (which only happens during
// a cascading cut), it means that one child subtree has been lost; if a
// second subtree is lost later during another cascading cut, then we move
// the node to the root list so that it can be re-balanced on the next
// consolidate.
//===========================================================================

void FibHeap::_CascadingCut(FibHeapNode *y) {
	FibHeapNode *z = y->Parent;

	while (z != NULL) {
		if (y->Mark == 0) {
			y->Mark = 1;
			NumMarkedNodes++;
			z = NULL;
		} else {
			_Cut(y, z);
			y = z;
			z = y->Parent;
		}
	}
}
