# Supplementary material
Source: ML conference proceedings conference paper supplement (https://openaccess.thecvf.com/content/cvpr_2016/html/Zhang_How_Far_Are_2016_CVPR_paper.html)
Supplement: Supplementary file 2 [file Zhang_How_Far_Are_2016_CVPR_supplemental.zip › 2016_cvpr_camera_ready_pedestrian_detection_supplementary/GT-visualization/toolbox/matlab/private/fibheap.h]

#ifndef FIBHEAP_H
#define FIBHEAP_H

//***************************************************************************
// The Fibonacci heap implementation contained in FIBHEAP.H and FIBHEAP.CPP
// is Copyright (c) 1996 by John Boyer
//
// Once this Fibonacci heap implementation (the software) has been published
// by Dr. Dobb's Journal, permission to use and distribute the software is
// granted provided that this copyright notice remains in the source and
// and the author (John Boyer) is acknowledged in works that use this program.
//
// Every effort has been made to ensure that this implementation is free of
// errors.  Nonetheless, the author (John Boyer) assumes no liability regarding
// your use of this software.
//
// The author would also be very glad to hear from anyone who uses the
// software or has any feedback about it.
// Email: jboyer@gulf.csc.uvic.ca
//***************************************************************************

#define OK      0
#define NOTOK   -1

#include <cstdio>

//======================================================
// Fibonacci Heap Node Class
//======================================================

class FibHeap;

class FibHeapNode
{
	friend class FibHeap;
	FibHeapNode *Left, *Right, *Parent, *Child;
	short Degree, Mark, NegInfinityFlag;

protected:
	inline int  FHN_Cmp(FibHeapNode& RHS) {
		if (NegInfinityFlag)
			return RHS.NegInfinityFlag ? 0 : -1;
		return RHS.NegInfinityFlag ? 1 : 0;
	}
	inline void FHN_Assign(FibHeapNode& RHS) {
		NegInfinityFlag = RHS.NegInfinityFlag;
	}

public:
	inline FibHeapNode() {
		Left = Right = Parent = Child = NULL;
		Degree = Mark = NegInfinityFlag = 0;
	}
	virtual ~FibHeapNode();
	virtual void operator =(FibHeapNode& RHS);
	virtual int  operator ==(FibHeapNode& RHS);
	virtual int  operator <(FibHeapNode& RHS);

	virtual void Print();
};

//========================================================================
// Fibonacci Heap Class
//========================================================================

class FibHeap
{
	FibHeapNode *MinRoot;
	long NumNodes, NumTrees, NumMarkedNodes;
	int HeapOwnershipFlag;

public:
	FibHeap();
	virtual ~FibHeap();

	// The Standard Heap Operations
	void Insert(FibHeapNode *NewNode);
	void Union(FibHeap *OtherHeap);
	inline FibHeapNode *Minimum() { return MinRoot; }
	FibHeapNode *ExtractMin();
	int DecreaseKey(FibHeapNode *theNode, FibHeapNode& NewKey);
	int Delete(FibHeapNode *theNode);

	// Extra utility functions
	int  GetHeapOwnership() { return HeapOwnershipFlag; };
	void SetHeapOwnership() { HeapOwnershipFlag = 1; };
	void ClearHeapOwnership() { HeapOwnershipFlag = 0; };
	long GetNumNodes() { return NumNodes; };
	long GetNumTrees() { return NumTrees; };
	long GetNumMarkedNodes() { return NumMarkedNodes; };
	void Print(FibHeapNode *Tree = NULL, FibHeapNode *theParent=NULL);

private:
	// Internal functions that help to implement the Standard Operations
	inline void _Exchange(FibHeapNode* &N1, FibHeapNode* &N2) {
		FibHeapNode *Temp; Temp = N1; N1 = N2; N2 = Temp;
	}
	void _Consolidate();
	void _Link(FibHeapNode *, FibHeapNode *);
	void _AddToRootList(FibHeapNode *);
	void _Cut(FibHeapNode *, FibHeapNode *);
	void _CascadingCut(FibHeapNode *);
};

#endif /* FIBHEAP_H */
