# Supplementary material
Source: ML conference proceedings conference paper supplement (https://openaccess.thecvf.com/content/cvpr_2016/html/Zhang_How_Far_Are_2016_CVPR_paper.html)
Supplement: Supplementary file 2 [file Zhang_How_Far_Are_2016_CVPR_supplemental.zip › 2016_cvpr_camera_ready_pedestrian_detection_supplementary/GT-visualization/toolbox/matlab/subsToArray.m]

function I = subsToArray( subs, vals, siz, fillVal )
% Converts subs/vals image representation to array representation.
%
% Constructs array from subs/vals representation.  Similar to Matlab's
% sparse command, except doesn't actually produce a sparse matrix.  Uses
% different conventions as well.
%
% USAGE
%  I = subsToArray( subs, vals, siz, [fillVal] )
%
% INPUTS
%  subs    - subscripts of point locations (n x d)
%  vals    - values at point locations (n x 1)
%  siz     - image size vector (1xd) - must fully contain subs
%  fillVal - [0] value to fill array with at nonspecified locs
%
% OUTPUTS
%  I       - array of size siz
%
% EXAMPLE
%
% See also SUB2IND2, SPARSE
%
% Piotr's Computer Vision Matlab Toolbox      Version 2.0
% Copyright 2014 Piotr Dollar.  [pdollar-at-gmail.com]
% Licensed under the Simplified BSD License [see external/bsd.txt]

if( nargin<4 || isempty(fillVal) ); fillVal=0; end

inds = sub2ind2( siz, subs );
I = repmat( fillVal, siz );
I(inds) = vals;
