# Supplementary material
Source: ML conference proceedings conference paper supplement (https://openaccess.thecvf.com/content/cvpr_2016/html/Zhang_How_Far_Are_2016_CVPR_paper.html)
Supplement: Supplementary file 2 [file Zhang_How_Far_Are_2016_CVPR_supplemental.zip › 2016_cvpr_camera_ready_pedestrian_detection_supplementary/GT-visualization/toolbox/matlab/text2.m]

function varargout = text2( varargin )
% Wrapper for text.m that ensures displayed text fits in figure.
%
% When text is called, Matlab displays the text, but does nothing to ensure
% that all of the text fits in the figure.  This function, after calling
% text, shrinks the axes until the text is fully visible.  Note that since
% font doesn't resize as the figure does, just because the text fully fits
% after text2 is called, no guaranties are made after the figure is
% resized.  Hence it is a good idea to resize the figure appropriately
% before calling text2.
%
% Same input/output options as Matlab's text.m command.
%
% USAGE
%  varargout = text2( varargin )
%
% INPUTS
%  varargin   - input to Matlab's text
%
% OUTPUTS
%  varargout  - output to Matlab's text
%
% EXAMPLE
%  figure(1); clf; text( -1 , 2, 'hello world' )  % will not appear
%  figure(2); clf; text2( -1 , 2, 'hello world' ) % will appear
%
% See also TEXT, IMLABEL
%
% Piotr's Computer Vision Matlab Toolbox      Version 2.0
% Copyright 2014 Piotr Dollar.  [pdollar-at-gmail.com]
% Licensed under the Simplified BSD License [see external/bsd.txt]

%%% call text normally
hs = text( varargin{:} );
if(nargout>=1); varargout={hs}; end;

%%% now make sure text fits
%%% update the OuterPosition (not regular Position) so good resize behavior
nhs = length(hs);
for i=1:nhs;  set(hs(i),'Units','Normalized');  end;
oldunits = get(gca,'Units'); set(gca,'Units','Normalized');
opos = get(gca,'OuterPosition'); %x y w h
updated = 1; updatedpos=1;
while( updated ); updated=0;
  for p=1:4
    if( updatedpos ); updatedpos=0;
      % get overall pos of text in normalized AXIS coordinates
      pos = [inf inf -inf -inf]; % [l b r t]
      for i=1:nhs
        extent = get(hs(i),'Extent'); % slow [l b w h]
        pos(1:2) = min( pos(1:2), extent(1:2) );
        pos(3:4) = max( pos(3:4), extent(1:2) + extent(3:4) );
      end;
      pos = pos * 1.05;
      pos(3:4) = pos(3:4) - pos(1:2);  % [l b w h]

      % convert pos to normalized FIGURE coordinates
      % must move origin, and also account for scaling
      axisPos = get(gca,'Position');
      pos(1) = axisPos(1) + pos(1) * axisPos(3);
      pos(2) = axisPos(2) + pos(2) * axisPos(4);
      pos(3) = pos(3) * axisPos(3);
      pos(4) = pos(4) * axisPos(4);
    end

    % if necessary, move OuterPosition of axes accordingly
    if( p<=2 && pos(p)<0 )
      step = min(.1,max(.001,-pos(p)/50));
      opos(p) = opos(p)+step;
      opos(p+2) = opos(p+2)-step;
      set(gca,'OuterPosition',opos);
      updated=1; updatedpos=1;
    elseif( p>2 && (pos(p-2)+pos(p))>1 )
      step = min(.1,max(.001,pos(p)/50));
      opos(p)=opos(p)-step;
      set(gca,'OuterPosition',opos);
      updated=1; updatedpos=1;
    end
  end
end
set(gca,'Units',oldunits);

%   if necessary, move OuterPosition of axes accordingly
%   if(p<=2 && pos(p)<0 )
%       step = max(.01,abs(pos(p))/1.5);
%       opos, step, pos, p
%       opos(p)=opos(p)+step;
%       opos(p+2)=opos(p+2)-step;
%       updated=1; updatedpos=1;
%       set(gca,'OuterPosition',opos);
%   elseif( p>2 && pos(p)>1 )
%       step = max(.01,(pos(p)-1)/1.5);
%       opos(p)=opos(p)-step;
%       updated=1; updatedpos=1;
%       set(gca,'OuterPosition',opos);
%   end
