# Supplementary material
Source: ML conference proceedings conference paper supplement (https://openaccess.thecvf.com/content/cvpr_2016/html/Zhang_How_Far_Are_2016_CVPR_paper.html)
Supplement: Supplementary file 2 [file Zhang_How_Far_Are_2016_CVPR_supplemental.zip › 2016_cvpr_camera_ready_pedestrian_detection_supplementary/GT-visualization/toolbox/matlab/tpsRandom.m]

function w = tpsRandom( LnInv, bendE )
% Obtain a random warp with the same bending energy as the original.
%
% USAGE
%  w = tpsRandom( LnInv, bendE )
%
% INPUTS
%  LnInv  - [see tpsGetWarp] bookstein warping parameters
%  bendE  - amount of bening energy for random warp to have
%
% OUTPUTS
%  w      - nonlinear component of warp for use in tpsInterpolate
%
% EXAMPLE
%
% See also TPSGETWARP
%
% Piotr's Computer Vision Matlab Toolbox      Version 2.0
% Copyright 2014 Piotr Dollar.  [pdollar-at-gmail.com]
% Licensed under the Simplified BSD License [see external/bsd.txt]

n = size(LnInv,1);
u = rand(n-3,1) - .5;
u = u / norm(u);
u = [u; 0; 0; 0];

% get U, sig, sigInv, requires some fanangling
[U,sig] = eig(LnInv);
U = real(U); sig=real(sig);
sig( abs(sig)<.000001)=0;
%sigInv = sig;
%sigInv(abs(sig)>.000001) = 1./sigInv(abs(sig)>.000001);

% get w (and v?)
%v = sqrt(bendE)* U * sqrt(sigInv) * u;
w = sqrt(bendE)* U * sqrt(sig) * u;

% % should be eye(N) with 3 0's
% sqrt(sigInv) * U' * LnInv * U * sqrt(sigInv)
% % should be equal
% v' * LnInv * v, bendE
