# Supplementary material
Source: ML conference proceedings conference paper supplement (https://openaccess.thecvf.com/content/cvpr_2016/html/Zhang_How_Far_Are_2016_CVPR_paper.html)
Supplement: Supplementary file 2 [file Zhang_How_Far_Are_2016_CVPR_supplemental.zip › 2016_cvpr_camera_ready_pedestrian_detection_supplementary/GT-visualization/toolbox/videos/Contents.m]

% VIDEOS
% See also
%
% Behavior annotation for seq files:
%   behaviorAnnotator - Caltech Behavior Annotator.
%   behaviorData      - Retrieve and manipulate behavior annotation of a video.
%
% Seq files [custom codec free video format]:
%   seqIo             - Utilities for reading and writing seq files.
%   seqReaderPlugin   - Plugin for seqIo and videoIO to allow reading of seq files.
%   seqWriterPlugin   - Plugin for seqIo and videoIO to allow writing of seq files.
%   seqPlayer         - Simple GUI to play seq files.
%
% Image and sequence alignment:
%   imagesAlign       - Fast and robust estimation of homography relating two images.
%   imagesAlignSeq    - Stabilize image sequence using coarse optical flow estimation.
%
% Miscellaneous:
%   kernelTracker     - Kernel Tracker from Comaniciu, Ramesh and Meer PAMI 2003.
%   opticalFlow       - Coarse-to-fine optical flow using Lucas&Kanade or Horn&Schunck.
